# Supplementary material
Source: PubMed Central journal article supplement (PMC6071796)
Supplement: EHP2395.s001.acco.pdf [file EHP2395.s001.acco.pdf]

**Note to readers with disabilities:** *EHP* strives to ensure that all journal content is accessible to all readers. However, some figures and Supplemental Material published in *EHP* articles may not conform to [508 standards](#) due to the complexity of the information being presented. If you need assistance accessing journal content, please contact [ehp508@niehs.nih.gov](mailto:ehp508@niehs.nih.gov). Our staff will work with you to assess and meet your accessibility needs within 3 working days.

### **Supplemental Material**

#### **Identification of Smoking-Associated Differentially Methylated Regions Using Reduced Representation Bisulfite Sequencing and Cell type-Specific Enhancer Activation and Gene Expression**

Ma Wan, Brian D. Bennett, Gary S. Pittman, Michelle R. Campbell, Lindsay M. Reynolds, Devin K. Porter, Christopher L. Crowl, Xuting Wang, Dan Su, Neal A. Englert, Isabel J. Thompson, Yongmei Liu, and Douglas A. Bell

#### **Table of Contents**

**Figure S1.** (A–J) Differential methylation tracks ( $\Delta$  Methylation) and SM-DMRs displayed across sample groups and across CRU-RRBS-Cell types with CD14+ histone modifications and transcription factor clusters (TFs) for (A) *HOXA5* region, (B) *AHRR*, (C) *AHRR-C5orf55-EXOC-AS*, (D) *ALPPL2*, (E) *PPP1R15A (GADD34)*, (F) *F2RL3, F2RL3-CPAMD8*, (G) *SLC24A3*, (H) *RDX*, (I) *SASH1*, and (J) *LRP5*. Boxed areas in each panel show the region of interest. UCSC genome browser views display RRBS results and additional Roadmap Project histone modifications and ENCODE project ChIPseq data.

**Figure S2.** The correspondence between RRBS and pyrosequencing measurements of DNA methylation at SM-DMRs for overlapping CRU subjects. (A–G) Plots show RRBS and pyrosequencing determined measurements of DNA methylation at SM-DMRs. Individual regions (A–F) and overall (G) with their corresponding Pearson correlations are denoted in different color and plotted separately as indicated. *LRP5* is not shown.

**Figure S3.** Pyrosequencing measurements on *HOXA5* and *RDX* SM-DMRs. (A, B) Upper panels show genome browser tracks for (top) Roadmap whole genome bisulfite sequencing (WGBS) in monocytes shows location of all CpGs in region, reference gene, differentially methylated CpGs by RRBS (red downward bar = loss of methylation, blue upward bar, gain of methylation), and RRBS DMR (black bar).

**Figure S4.** The correlation between AHRR SM-DMR, mRNA, eRNA, and cotinine levels among a subset of eight smokers and eight nonsmokers from the CRU-RRBS, CRU-mRNA and CRU-eRNA subgroups. (A) The correlation between AHRR mRNA, and eRNA expression ( $R^2=0.98$ ,  $p < 0.0001$ ). (B) eRNA was significantly correlated with serum cotinine levels ( $R^2=0.65$ ,  $p=0.0007$ ). (C) The correlation between average AHRR SM-DMR methylation from RRBS and mRNA expression ( $R^2=0.45$ ,  $p=0.0042$ ). Squares represent nonsmokers, while circles indicate smokers.

**Table S1.** Pyrosequencing and BSAS assay primers.

**Table S2.** mRNA Real-time Polymerase Chain Reaction Assays.

**Table S3.** Enhancer RNA RT-PCR Primers.

## References

**Additional File-** Excel Document

Figure S1

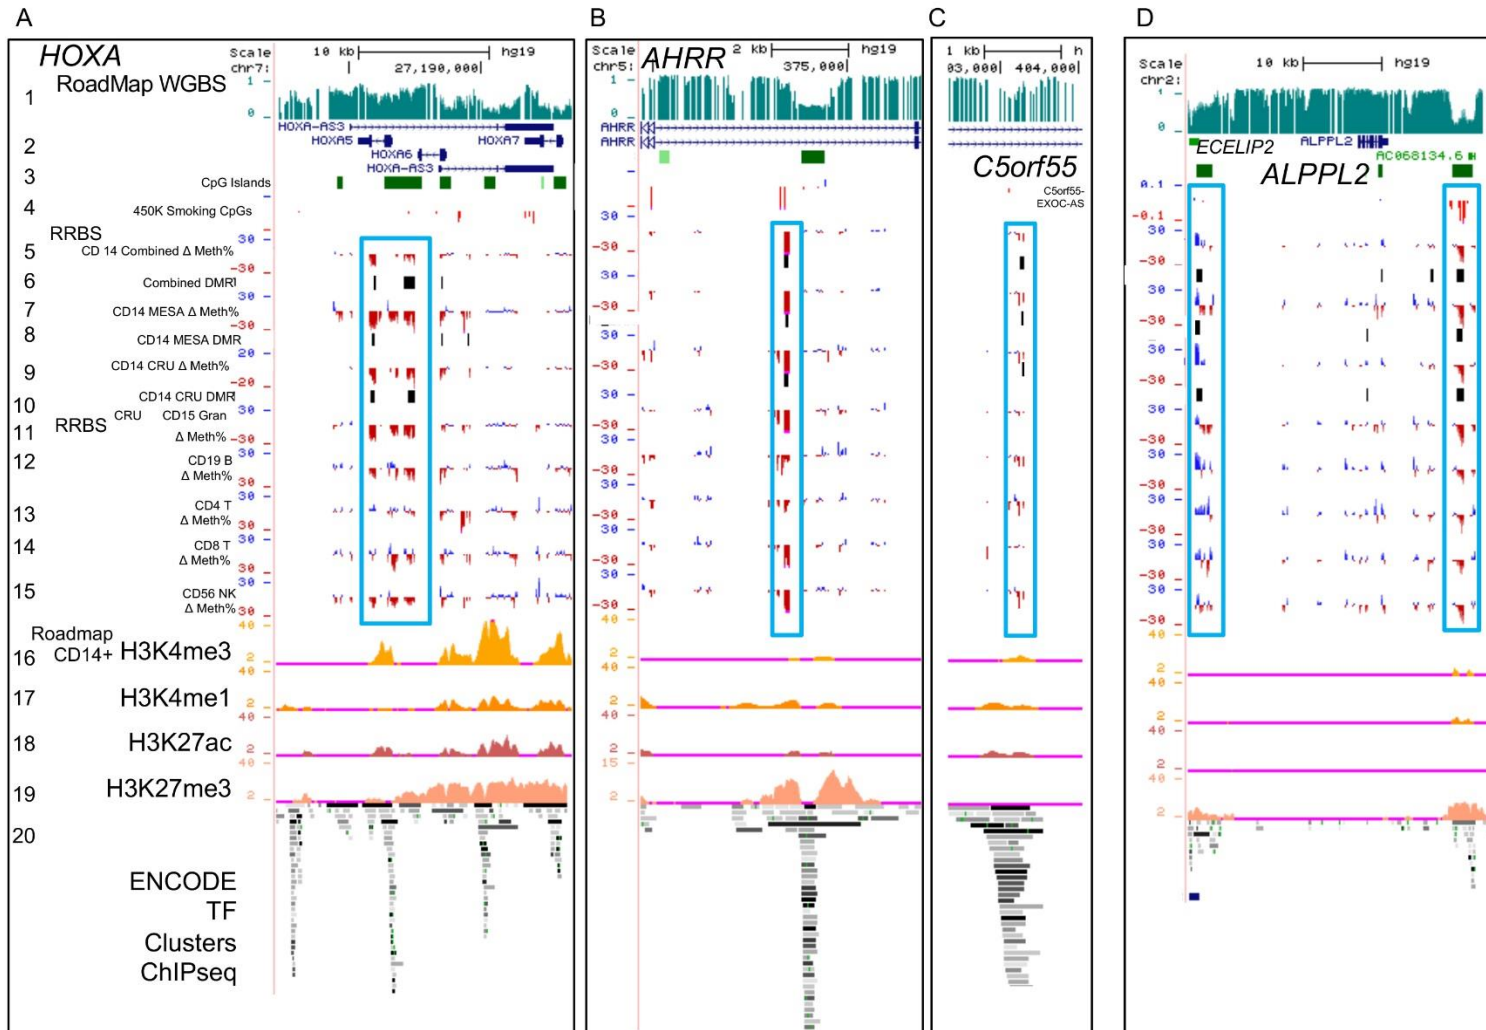

Figure S1

E

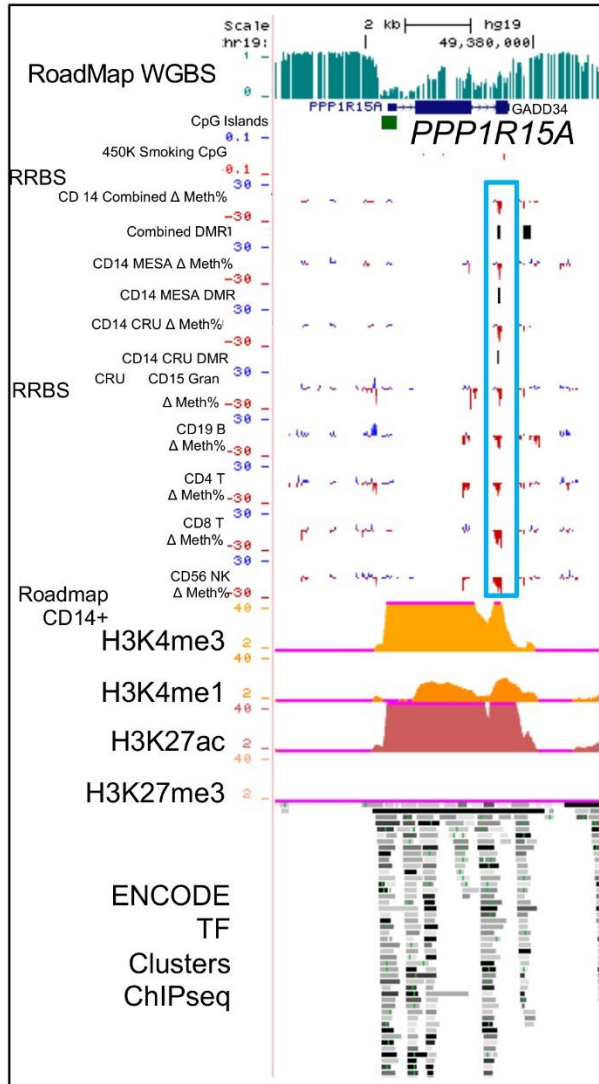

F

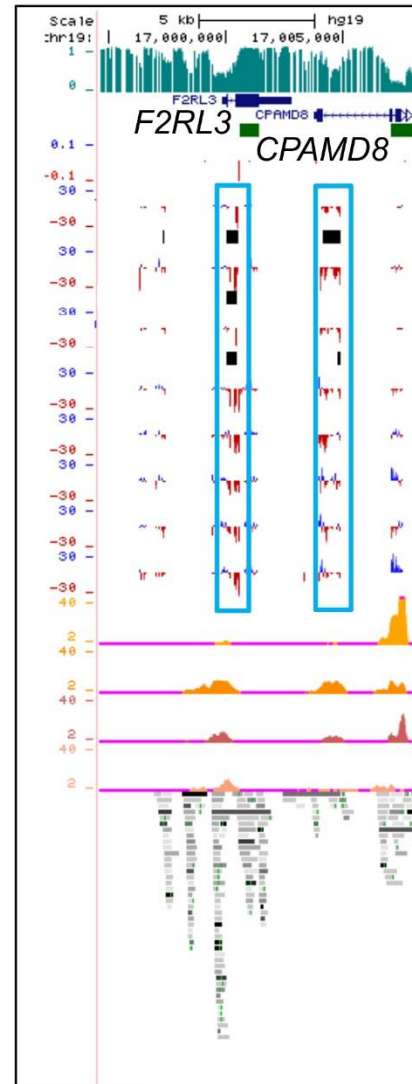

G

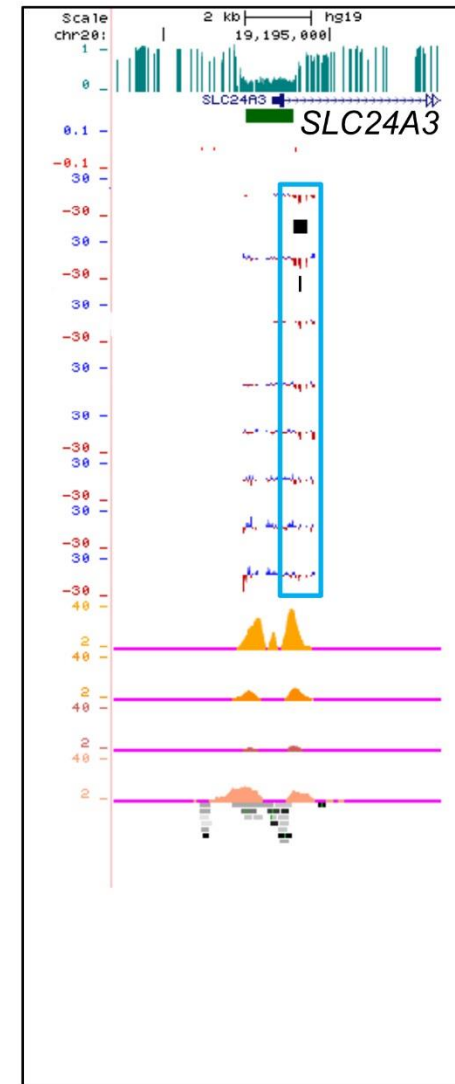

Figure S1

H

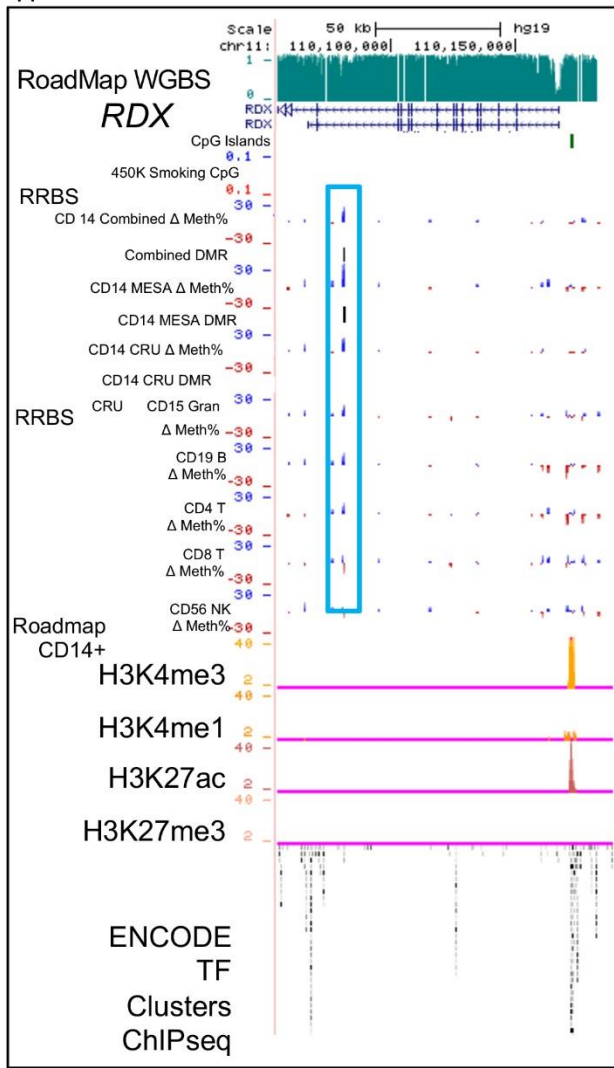

I

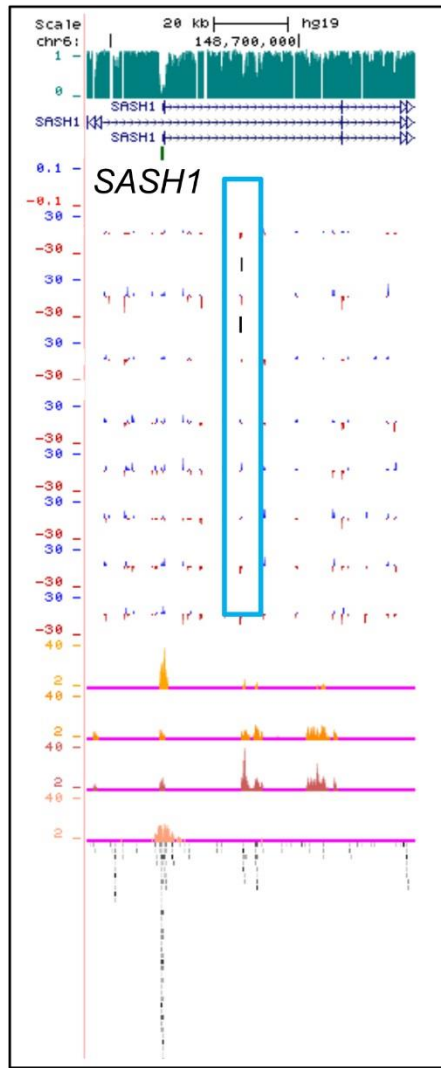

J

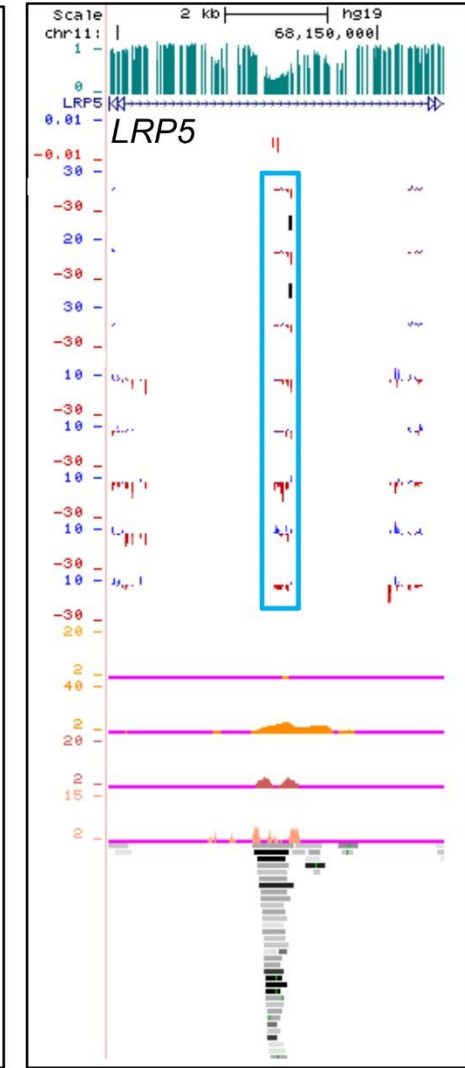

Figure S1 K

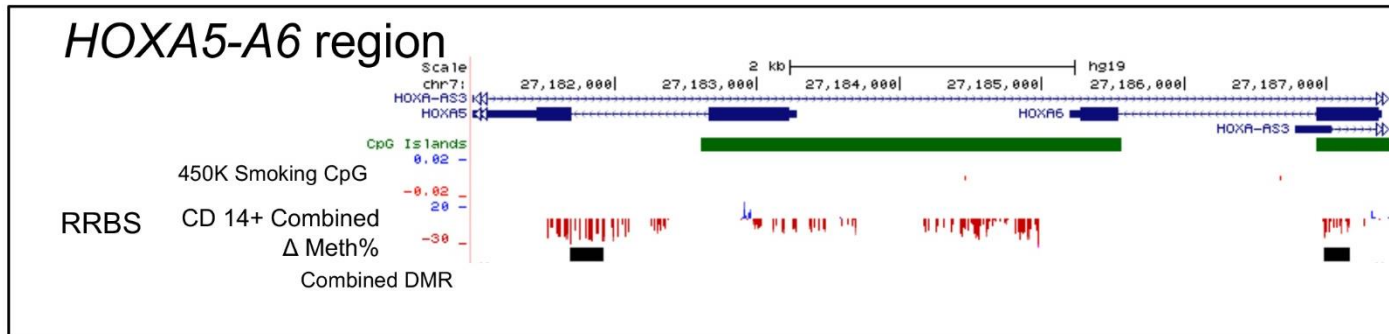

**Figure S1.** (A–J) Differential methylation tracks ( $\Delta$  Methylation) and SM-DMRs displayed across sample groups and across CRU-RRBS-Cell types with CD14+ histone modifications and transcription factor clusters (TFs) for (A) *HOXA5* region, (B) *AHRR*, (C) *AHRR-C5orf55-EXOC-AS*, (D) *ALPPL2*, (E) *PPP1R15A (GADD34)*, (F) *F2RL3, F2RL3-CPAMD8*, (G) *SLC24A3*, (H) *RDX*, (I) *SASH1*, and (J) *LRP5*. Boxed areas in each panel show the region of interest. UCSC genome browser views display RRBS results and additional Roadmap Project histone modifications and ENCODE project ChIPseq data. Each panel includes the following browser tracks (from top to bottom):

1. Roadmap Epigenome Whole Genome Bisulfite Sequencing CD14+ cells (nonsmoker)
2. Refseq genes
3. CpG islands
4. 450K Smoking-associated CpGs (from Joehanes et al. 2016)
- 5-10: CD14+ monocytes RRBS methylation difference relative to nonsmokers ( $\Delta$ Meth%, red, negative change = loss of methylation, blue, positive change = gain of methylation) and SM-DMR location (RRBS-Combined, MESA-RRBS and CRU-RRBS analyses)
- 11-15: Differential methylation tracks for five CRU-RRBS-Celltypes (CD15+  $\Delta$ Meth%, CD19+  $\Delta$ Meth%, CD4+  $\Delta$ Meth%, CD8+  $\Delta$ Meth%, CD56+  $\Delta$ Meth%)
- 16-19: Roadmap Histone modifications, CD14+ monocytes (nonsmoker)
20. ENCODE transcription factor ChIPseq clusters (compressed view).

(K) *HOXA* region showing nominally significant differentially methylated CpGs at previously unknown smoking-associated locations in or near *HOXA5-A6*. 450K Smoking-associated CpGs are CpG locations identified as smoking associated by Joehanes et al (2016.)

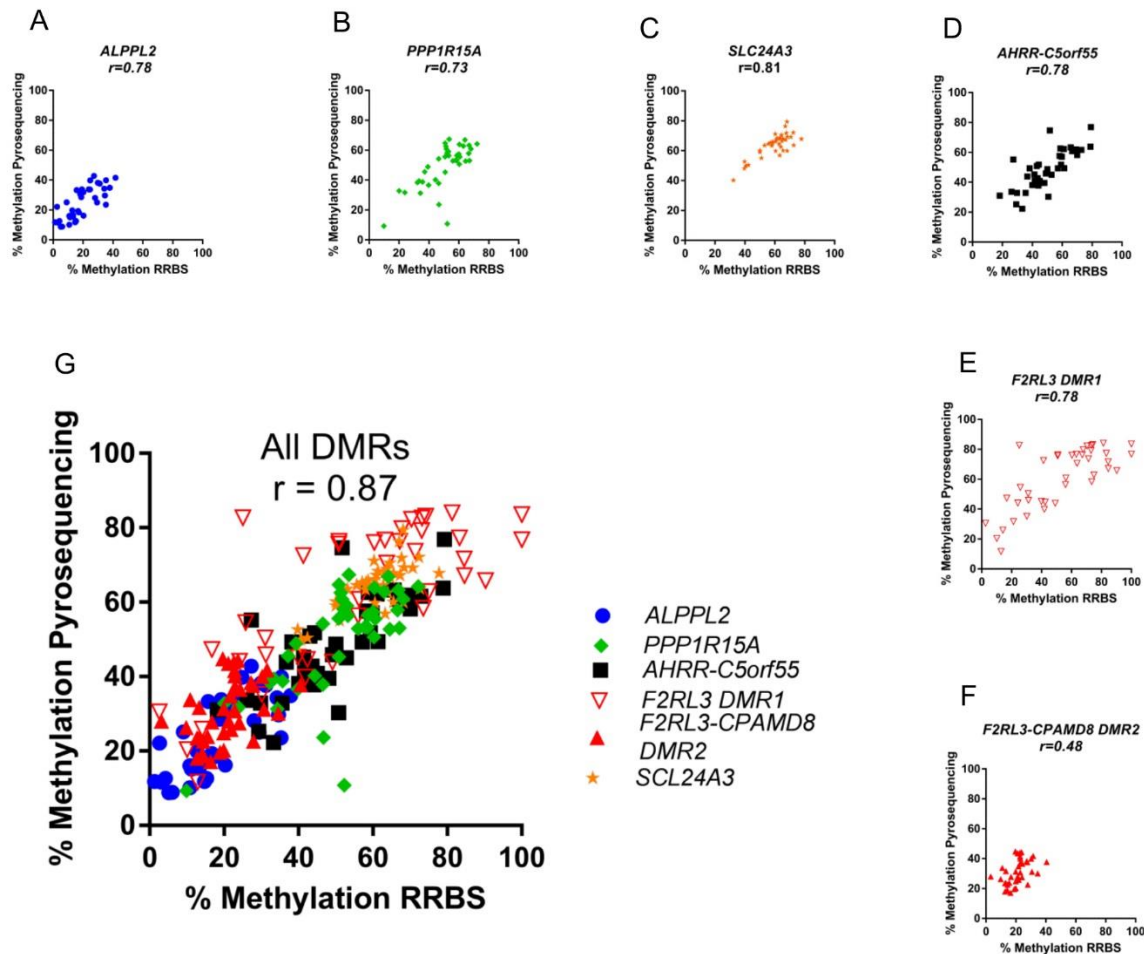

Figure S2. The correspondence between RRBS and pyrosequencing measurements of DNA methylation at SM-DMRs for overlapping CRU subjects. (A-G) Plots show RRBS and pyrosequencing determined measurements of DNA methylation at SM-DMRs. Individual regions (A-F) and overall (G) with their corresponding Pearson correlations are denoted in different color and plotted separately as indicated. LRP5 is not shown.

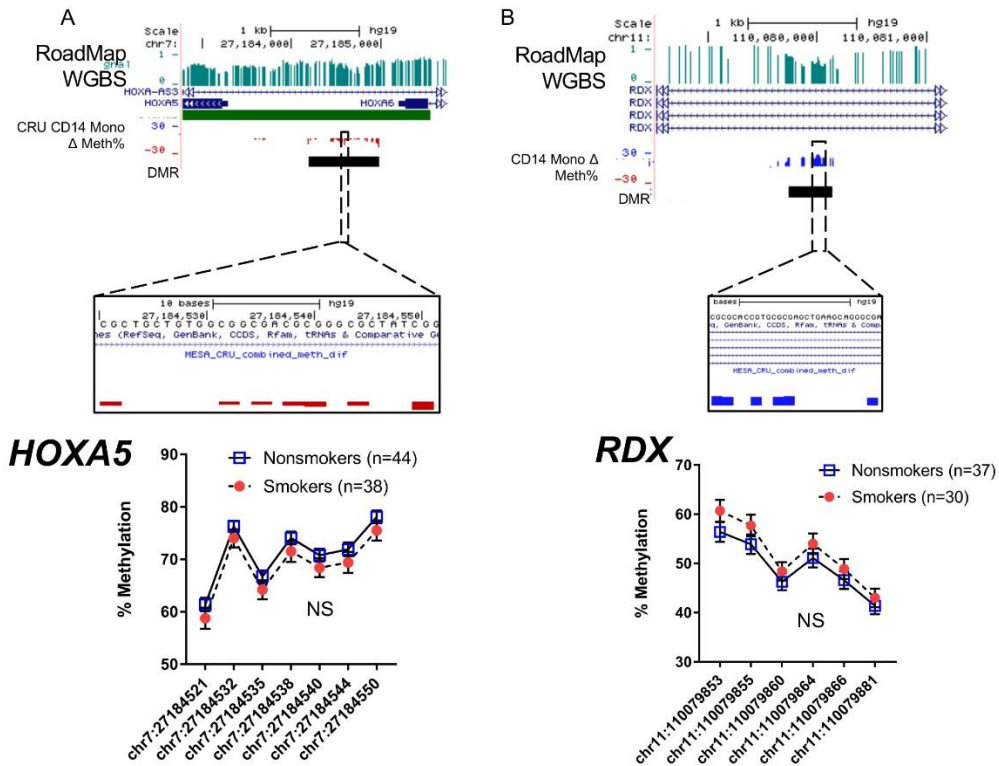

Figure S3. Pyrosequencing measurements on HOXA5 and RDX SM-DMRs. (A, B) Upper panels show genome browser tracks for (top) Roadmap whole genome bisulfite sequencing (WGBS) in monocytes shows location of all CpGs in region, reference gene, differentially methylated CpGs by RRBS (red downward bar = loss of methylation, blue upward bar, gain of methylation), and RRBS DMR (black bar).

Insert shows the RRBS CpGs that were tested. Lower panels show the differential methylated CpGs from HOXA5 and RDX DMRs examined by pyrosequencing in the CRU-Pyro group. At each CpG the difference between smokers and nonsmokers was similar to the RRBS result but this difference was not significant. Subject numbers for successful pyrosequencing assays are indicated for nonsmokers and smokers. Blue open squares represent nonsmokers, red circles indicate smokers.



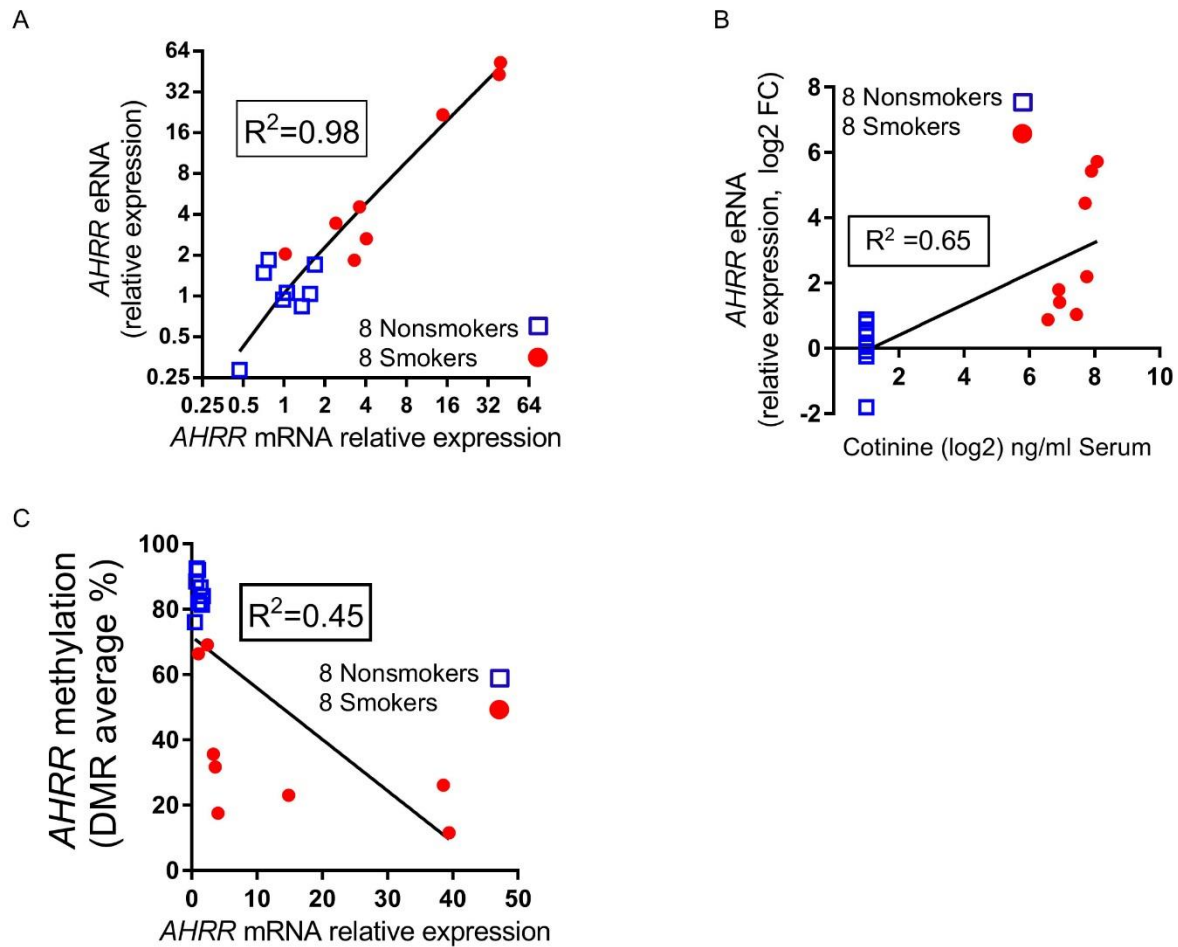

Figure S4. The correlation between AHRR SM-DMR, mRNA, eRNA, and cotinine levels among a subset of eight smokers and eight nonsmokers from the CRU-RRBS, CRU-mRNA and CRU-eRNA subgroups. (A) The correlation between AHRR mRNA, and eRNA expression ( $R^2=0.98$ ,  $p < 0.0001$ ). (B) eRNA was significantly correlated with serum cotinine levels ( $R^2=0.65$ ,  $p=0.0007$ ). (C) The correlation between average AHRR SM-DMR methylation from RRBS and mRNA expression ( $R^2=0.45$ ,  $p=0.0042$ ). Squares represent nonsmokers, while circles indicate smokers.

Supplemental Table S1. Pyrosequencing and BSAS assay primers

| GeneID                      | Forward Primer                 | Reverse Primer                  | Sequencing Primer        | CpGs                                                                                                                |
|-----------------------------|--------------------------------|---------------------------------|--------------------------|---------------------------------------------------------------------------------------------------------------------|
| <i>ALPPL2</i>               | TTGGTGGAGTTGTTTTTGAGAGAAGT     | CATCCCATAAACCCAAATAACCC         | ACCTCCATACCATAAAACCC     | chr2:233284491, 233284494, 233284501, 233284504, 233284510, 233284517                                               |
| <i>AHRR-C5orf55-EXOC-AS</i> | TGGGAGGGGGATAAAGAAGG           | CCCCACTCCCCTCCTCAA              | AGGTAAATTAGGAGGTAGAAA    | chr5:403298, 403307, 403312                                                                                         |
| <i>F2RL3 DMR1</i>           | TTGTAGAGGTAGGGGTTGATTGAG       | AAACACCCAACCCAAAAACAATA         | GATAGTGATATTTTGGAGTTT    | chr19:17000465, 17000476                                                                                            |
| <i>F2RL3 DMR2</i>           | AGTTGTTTATAGGTTGGATGTTTTGTTAAT | CCCACAACCTAACATTCTATTC          | GTTTGTTTAGAAAGAGGTT      | chr19:17004845, 17004874                                                                                            |
| <i>HOXA5</i>                | TTTTGGTAAGTTTGAAGTTAGGATTT     | CCCAACAAAACCCAATCTCT            | GGGTTTTTAGTTGGGTTTTGAA   | chr7:27184521, 27184532, 27184535, 27184538, 27184540, 27184544, 27184550                                           |
| <i>LRP5</i>                 | GGTTTAGGTAGTTTGTGTTTGGTATA     | BIO-CCTAAAATTAACCTTTAACATATCTCC | ATTTGTTTTGTTTTTTTATTGAAG | chr11:68148333, 68148355, 68148365                                                                                  |
| <i>PPP1R15A</i>             | GTTAGGGTTTTGGGAGTAGT           | AATTCCTAAAACCTACCCAAACTCTAACCC  | TTTTGGGAGTAGTTTGT        | chr19:49378964, 49378970, 49378976, 49378981, 49378985, 49378988                                                    |
| <i>RDX</i>                  | AGTGGGTATAGTTAGTGGA            | BIO-AACTCCCTAACCTCTTAAACTT      | GGGTATAGTTAGTGAT         | chr11:110079853, 110079855, 110079860, 110079864, 110079866, 110079881                                              |
| <i>SLC24A3</i>              | TGAAGGATTTAAGGGGATTGTTTAATATA  | CCCATAACTAAAAACCAACACTTTTTCTC   | TTTTTTAATTTTTTTTAGAATAGG | chr20:19194143                                                                                                      |
| <i>AHRR-BSAS</i>            | TTTTTGGTTGTAGTGAATTTG          | AAAAACCAACCTATCCCCTAC           | NA                       | chr5:373193, 373199, 373203, 373248, 373250, 373315, 373353, 373355, 373378, 373398, 373423, 373476, 373490, 373494 |

Supplemental Table S2. mRNA Real-time Polymerase Chain Reaction Assays

| <b>Gene</b>                 | <b>Assay ID</b> |  |
|-----------------------------|-----------------|--|
| <i>ACTB</i>                 | HS99999903_m1   |  |
| <i>ALPPL2</i>               | HS00741068_g1   |  |
| <i>AHRR</i>                 | HS01005075_m1   |  |
| <i>AHRR-C5orf55-EXOC-AS</i> | HS00744706_s1   |  |
| <i>F2RL3-CPAMD8</i>         | HS00610855_m1   |  |
| <i>F2RL3</i>                | HS01006385_g1   |  |
| <i>HOXA5</i>                | HS00430330_m1   |  |
| <i>LRP5</i>                 | HS00182031_m1   |  |
| <i>PPP1R15A</i>             | HS00169585_m1   |  |
| <i>RDX</i>                  | NT              |  |
| <i>SASH1</i>                | HS00323932_m1   |  |
| <i>SLC24A3</i>              | HS00915003_m1   |  |
|                             |                 |  |

Supplemental Table 3. Enhancer RNA RT-PCR Primers

| <b>SM-DMR enhancer regions</b>     | <b>Locus</b>             | <b>Primers-Forward</b> | <b>Primers-Reverse</b> |
|------------------------------------|--------------------------|------------------------|------------------------|
| AHRR - Region 2                    | chr5:371604-371689       | TGTCCTAGACCCACCTGTCC   | GCCTGGAAGGACAGTCAGAG   |
| AHRR - Region 3                    | chr5:371947-372028       | TTCCTCTCATCTGGCTGCTT   | AGGTCCCTATTGGCAGGACT   |
| AHRR - Region 4                    | chr5:372157-372267       | CTCAGTGCCTTCCCTCCTC    | ACAGTCCCCTCTGTGCAGTC   |
| AHRR - Region 5                    | chr5:372483-372586       | CATCTCGCCTTCTTTTCAGC   | GGCTGAAGTTTCTGCTCTG    |
| AHRR - Region 6                    | chr5:372694-372825       | CTACCAGGGAATTGGCTTCA   | ACTCGGTCTGACCCACAGTC   |
| AHRR - Region 7                    | chr5:373202-373306       | TGGGGACTGTTACCTCTG     | GCAATGAGAGGCTGGAAGG    |
| AHRR - Region 8                    | chr5:373630-374020       | GACTGGGGCTGGAGAGGT     | GCCTTTTCCCCGAGAAGC     |
| AHRR - Region 9                    | chr5:374334-374463       | GGTCTGCACTTGGGAGAAAG   | GAAACCCAGCATCCTAGC     |
| AHRR - Region 10                   | chr5:374798-375014       | CTGAATCAATGGCTCCCAGT   | TGCTCTGAGCTCTCCTCACC   |
| AHRR - Region 11                   | chr5:376293-376403       | AGGAGGGGACAGAGAGCAGT   | CTCAGATCAGCCAGGAGAGG   |
| AHRR - Region 12                   | chr5:375746-375863       | CCCTCAGTCTCTCAGAAGC    | GACTGACCAAGGGCTGAGTT   |
| AHRR - Region 14                   | chr5:369226-369349       | CCATGTGTCAAGAGCAGCAC   | CCTCAGGTGTCCCAGAAAAC   |
| AHRR - Control Region 1 (Locus A)  | chr5:349510-349652       | GTGAAACCCCGTCTCCACTA   | GTGATCTTGGCTCACTGCAA   |
| AHRR - Control Region 21 (Locus B) | chr6:2613040-2613144     | GCAGCCATAAAAAGGGTGAG   | GCGGTGTTTGGTTTTCTGTT   |
| ALPPL2-6eRNA                       | chr2:232421401-232421482 | TCACCAGGGAGCTTCTTTA    | GAGACAACCAGAAGCCCAGA   |
| C5orf55-EXOC-AS-1eRNA              | chr5:402729-402817       | GCATTTACCCAAAGGAGCTG   | CTGTGCATTCACTGGTGGAC   |
| F2RL3-1eRNA                        | chr19:16889457-16889569  | TGTCATGTCCAGCTGTTTCC   | GGAGAGAGAGGGGACCTCAG   |
| F2RL3-CPAMD8-1eRNA                 | chr19:16893971-16894052  | CGGCTGGATGTTTTGCTAAT   | CATTCCCAGAAAGCACTCGT   |
| HOXA5-1eRNA                        | chr7:27143756-27143844   | CGAATCACGTGCTTTTGTTG   | CTCCACCCAACTCCCCTATT   |
| LRP5-2eRNA                         | chr11:68380478-68380570  | CCGACAGCTAGAAGGAAGGA   | TGCCACTCTCACACAAAAGC   |
| SASH1-1eRNA                        | chr6:148363394-148363485 | GGCCTCCCAACACTTCTTTT   | AGGTTGCAGTGAGCGAAGAT   |

## References

Joehanes R, Just AC, Marioni RE, Pilling LC, Reynolds LM, Mandaviya PR, et al. 2016. Epigenetic signatures of cigarette smoking. *Circ Cardiovasc Genet* 9:436-447.
